# Supplementary material for: Soy Isoflavones in Nutritionally Relevant Amounts Have Varied Nutrigenomic Effects on Adipose Tissue
Source: PubMed Central journal article supplement (PMC6272387; doi:10.3390/molecules20022310), 2015-01-30
Supplement: molecules-20-02310-s001.pdf [file molecules-20-02310-s001.pdf]

## Supplementary Materials

**Table S1.** Chemical composition of the Soyselect batch used in this study.

|                                                         |          |                       |
|---------------------------------------------------------|----------|-----------------------|
| <b>Energy Value</b>                                     | 58 (247) | kcal/100 g (kJ/100 g) |
| <b>Proteins (as sum of aminoacids after hydrolysis)</b> | 1.93     | g/100 g               |
| <b>Total Fat</b>                                        | 1.4      | g/100 g               |
| • Saturated Fatty Acids                                 | 0.14     | g/100 g               |
| • Monounsaturated Fatty Acids                           | <0.05    | g/100 g               |
| • Polyunsaturated Fatty Acids                           | 0.21     | g/100 g               |
| • trans-Fatty Acids                                     | <0.05    | g/100 g               |
| <b>Total Dietary Fiber</b>                              | <0.5     | g/100 g               |
| <b>Sugars Composition</b>                               |          |                       |
| Fructose, anhydrous                                     | 2.10     | g/100 g               |
| Glucose, anhydrous                                      | 0.73     | g/100 g               |
| Lactose, anhydrous                                      | <0.10    | g/100 g               |
| Saccharose (Sucrose), anhydrous                         | 6.70     | g/100 g               |
| Maltose, anhydrous                                      | <0.10    | g/100 g               |
| <b>Total Sugars</b>                                     | 9.53     | g/100 g               |
| <b>Moisture</b>                                         | 3.9      | g/100 g               |
| <b>Ash</b>                                              | 2.54     | g/100 g               |
| <b>Sodium</b>                                           | 37.0     | mg/100 g              |
| <b>Calcium</b>                                          | 2.82     | mg/100 g              |
| <b>Iron</b>                                             | 0.32     | mg/100 g              |
| <b>Cholesterol</b>                                      | <0.10    | mg/100 g              |
| <b>Vitamin A (retinol)</b>                              | <0.01    | mg/100 g              |
| <b>B-Carotene</b>                                       | <0.02    | mg/100 g              |
| <b>Vitamin C (Ascorbic Acid, HPLC)</b>                  | <2.5     | mg/100 g              |

**Table S2.** Soy isoflavones mix induced genes.

|                    |                    |               |               |               |               |
|--------------------|--------------------|---------------|---------------|---------------|---------------|
| DEFB37             | DEFB21             | EIF3K         | PAPOLB        | C730025P13RIK | BEX4          |
| DEFB38             | HEXB               | PRPS1L1       | ADAM5         | STK22B        | RASL2-9       |
| PRM1               | 4921520G13RIK      | ST6GALNAC2    | 1700021C14RIK | 2700055A20RIK | LOC100044177  |
| SPINT4             | OTTMUSG00000016790 | OXCT2B        | LCN13         | SQRDL         | CYP4A12A      |
| OTTMUSG00000016293 | BHLHB2             | BCAS2         | MRPS18C       | KPNB1         | 1190002A17RIK |
| DEFB23             | NLRP14             | GM128         | KRT14         | D430015B01RIK | 1700093K21RIK |
| DEFB39             | COX6C              | SMARCD3       | SEC61G        | 4921507P07RIK | SLC2A3        |
| OAZ3               | NTSR2              | DEFB29        | ODF4          | CLK1          | SLC30A6       |
| SMCP               | TCP11              | D19ERTD721E   | MAP1LC3B      | TAX1BP1       | BCKDHB        |
| 4931407G18RIK      | HOXD4              | 1700025K23RIK | ODF3          | CAGE1         | CCNL1         |
| NPY                | COX8C              | A330021E22RIK | SOCS7         | HGFAC         | IRGM          |
| FABP9              | ARL8A              | 1700010M22RIK | WDR20B        | NPAL2         | TWISTNB       |
| 9230002F21RIK      | CRISP4             | ACRV1         | LOC100047749  | 1700010A17RIK | SLTM          |
| SPAG11             | CLDN11             | AKTIP         | GM1679        | XLR4A         | RAB5C         |
| OTTMUSG00000015852 | DDX25              | STARD10       | CCNO          | BC048546      | RNF133        |
| SPINK2             | DYNLT3             | CCDC113       | RASSF3        | MRPL20        | YWHAB         |
| SPINK8             | C130090K23RIK      | ENPP2         | CDH1          | RPO1-1        | 1700067P10RIK |
| AY761185           | CAMK2B             | CCT6B         | PRF1          | 1300007L22RIK | WBP4          |
| TNP1               | MYCBPAP            | ZMAT1         | 1700026L06RIK | FRK           | ZFP654        |
| CUZD1              | 2410116G06RIK      | PICALM        | GRHL2         | AGPAT3        | ZBBX          |
| SPINK11            | SETX               | COQ2          | 4921517D21RIK | RRN3          | PABPC2        |
| DEFB2              | LOC100042777       | GAPDHS        | A530050D06RIK | CIZ1          | PLP1          |
| TSSK6              | DDC8               | KIF2B         | ANKRD46       | LOC100047200  | RAD52         |
| INDO               | LOC677317          | MNS1          | SLC1A1        | LOC100048020  | EG385328      |
| RPL3L              | KCNC4              | GSTT3         | UBQLNL        | 4933402J07RIK | PLA2G4F       |
| ADAM32             | TCOF1              | CPEB2         | SPZ1          | LIP1          | DAPL1         |
| WFDC15B            | SLFNL1             | LCN8          | 1700054O13RIK | HSP90B1       | CFB           |
| ODF1               | KLHL10             | 1700020D05RIK | VDAC2         | 4922505E12RIK | 1700001C02RIK |
| DEFB11             | CCDC92             | 1700065I17RIK | 4833420G17RIK | ERGIC2        | TLE2          |

Table S2. *Cont.*

|           |               |               |               |               |               |
|-----------|---------------|---------------|---------------|---------------|---------------|
| WFDC10    | PRM3          | SERF1         | FYCO1         | ELAVL1        | 2610101N10RIK |
| DEFB19    | LRRC50        | 1700011H14RIK | ATP6V1A       | UHRF1BP1L     | 1700019H03RIK |
| ALDH6A1   | GRB7          | 4732415M23RIK | 4933422H20RIK | RASGRF1       | THAP4         |
| SPINLW1   | PTGDS         | MOD1          | EMG1          | DYNLRB2       | DEFB12        |
| RSPH1     | 1810015C04RIK | CTNNB1        | LLGL2         | NDUFB9        | IQCF4         |
| BC051142  | LOC100039532  | 1700029H14RIK | TMEM51        | CGGBP1        | TCTEX1D2      |
| TCFAP2B   | GSTT4         | NOTCH1        | ACTL7B        | TRIM36        | NIT1          |
| LCN12     | MFAP3L        | 4930412F15RIK | MED28         | ARRDC2        | 1110002B05RIK |
| TULP2     | LOC100048622  | NT5C1B        | TMCO5         | ARHGEF4       | 1700026D08RIK |
| LDHC      | HCFC1         | CHCHD7        | COL16A1       | TNP2          | HOXD3         |
| BC030476  | PTPRB         | IDH2          | CYB561        | ADAM28        | SETD1B        |
| BC048679  | GLDC          | NXF1          | HIST2H2BE     | H3F3B         | ISYNA1        |
| PGK2      | TUBA3B        | BC038286      | 1700012L04RIK | KRT8          | CC2D2A        |
| LOC435023 | SYTL4         | CUL1          | USP20         | 1700007K09RIK | M6PR          |
| SPATA19   | LYPD4         | HADHB         | SMAD1         | ATP5A1        | DEFB10        |
| GSG1      | SLC7A4        | TMC5          | 4930526D03RIK | MBOAT1        | ZBPB          |
| PGAM2     | DDIT4L        | HILS1         | PTGES3        | ZDHHC4        | OTUD5         |
| ZNRF4     | ATP13A4       | 1700094C09RIK | HSD17B10      | HNRPAB        | ZC3H15        |
| UBQLN3    | DEFB42        | AQP9          | 1700057K13RIK | TBC1D8        | 2400003C14RIK |
| GYKL1     | SPATA6        | 1700049L16RIK | TEKT1         | BC020002      | SPO11         |
| SVS4      | ACTL6A        | PRDX6-RS1     | CCT8          | ATF4          | CLIC3         |
| SERPINA1F | LRRC57        | BC049635      | SMEK2         | 1110017D15RIK | SLC38A5       |
| HDAC6     | TDRD6         | EG432867      | 4931406C07RIK | MAPBP1P       | EG654465      |
| CLGN      | CST9          | ENOPH1        | EXOSC8        | LRRC34        | IL10RB        |
| KCNK1     | YBX2          | ACTL7A        | SKP1A         | HUWE1         | LOC100045098  |
| TSGA8     | BGLAP-RS1     | BZW1          | MDH1B         | 4930404H21RIK | 5133400G04RIK |
| CLDN3     | PFN3          | EG433365      | CUGBP2        | GM614         | SGPP1         |
| LY6F      | SMC5L1        | CLCNKB        | REC8          | PAIP2         | CAPZA3        |

Table S2. *Cont.*

|               |               |               |                    |               |               |
|---------------|---------------|---------------|--------------------|---------------|---------------|
| DBIL5         | P2RX2         | NOL14         | SATB1              | HSD3B2        | CYB5R1        |
| SVS5          | 1700034E13RIK | ARID2         | HOOK2              | PURB          | AKAP3         |
| 4922502D21RIK | AI314180      | CLDN4         | WDR23              | CSTL1         | MTMR12        |
| EIF2S3Y       | NUP210        | LOC100048480  | KCTD2              | LRRC46        | 5830403L16RIK |
| TESK1         | MLF1          | ADCY8         | OTTMUSG00000015859 | GNPDA2        | CRYBA4        |
| PLS3          | DEFB40        | ZFP263        | SNX1               | NDFIP2        | PRPS2         |
| PDZK1         | SPINK10       | H2-AA         | RPRM               | GLB1          | LAMA1         |
| HOXB4         | ESPN          | TCTE3         | STAG3              | 1700123L14RIK | PQLC1         |
| LOC669168     | CDH16         | ODF2          | DPEP3              | TAF13         | COX7A2        |
| AP3B2         | KRT18         | C4BP          | TRIP12             | MGL1          | DRBP1         |
| RNASE9        | SUSD4         | LOC217341     | GM1698             | R3HDM2        | 4933405O20RIK |
| AKR1C19       | SPACA3        | SRP14         | LYZL4              | PBP2          | PGM2          |
| HBB-B1        | ALDH1A1       | EG665378      | RGMA               | CDC42EP3      | TMEM176B      |
| WFDC6B        | GKAP1         | 1600016N20RIK | LOC100044779       | 1700018C11RIK | SLC44A4       |
| ADAM3         | ACTG2         | DDX21         | DDX3X              | PRSS21        | PTPRE         |
| PACRG         | DEFB30        | 1700080E11RIK | ACTR3              | 1700019D03RIK | SNF8          |
| CYP17A1       | ACSBG2        | ISG20         | ST13               | ARL1          | ANKRD10       |
| SEC11C        | HRASLS5       | PGRMC1        | HMGB4              | 4930451I11RIK | ZC3H6         |
| NPC2          | D11WSU47E     | FHL5          | AHCTF1             | SPAG6         | PIWIL1        |
| DNAJC5B       | TCP10A        | CYP1B1        | NDUFB10            | ECSIT         | CSPP1         |
| DAZAP2        | EMB           | HSDL1         | SPERT              | PTPN1         | IZUMO1        |
| ACADSB        | SELK          | H1FNT         | LYZL1              | TTC29         | D030013I16RIK |
| DEFB15        | TESP1         | QRICH2        | PLAA               | SERINC2       | MGC107098     |
| MRPL52        | SVS7          | TMED9         | DCUN1D5            | TECTA         | RPS3A         |
| RHBDL2        | LTF           | CRISP1        | MARCH10            | CCDC54        | HSPA2         |
| 4930563D23RIK | HSPA1L        | DNALI1        | PRPS1              | GALNTL5       | AKAP4         |
| WFDC13        | S100A10       | SPATA20       | RAG1AP1            | CATSPER3      | 1700030J22RIK |

**Table S2. Cont.**

|              |               |        |               |         |               |
|--------------|---------------|--------|---------------|---------|---------------|
| RBM35A       | LOC100048703  | OXCT2A | GOT2          | DEFB25  | AARD          |
| LOC100047619 | DEFB43        | LCN5   | ARMCX1        | TXNDC8  | HOXD8         |
| POLR2G       | ACTRT2        | DEFB20 | 1700029J07RIK | TXNDC12 | DEFB18        |
| ZXDA         | RNASE12       | PROM2  | TXNDC2        | SLCO4A1 | 2900010M23RIK |
| YWHAZ        | 9230104L09RIK | LYZL6  | PABPC1        | TJP2    | TRIM39        |
| TUBA3A       | DNAJC10       | TEDDM1 | 4930503B20RIK | UPK1B   | BC089491      |
| ADAM7        | LYAR          | ENPP1  | KCNH3         | TPP2    | SPHK1         |

**Table S3. Soy isoflavones mix repressed genes.**

|           |               |               |               |               |               |
|-----------|---------------|---------------|---------------|---------------|---------------|
| LYZ2      | C1QB          | TMEM9         | 2410166I05RIK | THRSP         | TAP1          |
| NNAT      | LAMC1         | IGFBP6        | AGTR1A        | GTRGEO22      | CRY2          |
| GSN       | ARSB          | NID2          | LOX           | IL1RL1L       | 2010316F05RIK |
| APCDD1    | ADRB3         | DGAT2         | HIST1H2BH     | APOC3         | ORC6L         |
| SERPINA3C | 2210021J22RIK | 2010311D03RIK | REEP5         | RGS16         | HEPH          |
| VIM       | MFAP5         | LOC100046393  | LOC100044204  | GEMIN7        | C1QBP         |
| TMEM45B   | TMEM131       | 2310058J06RIK | DYNC1LI2      | LEPREL2       | EPB4.9        |
| SSPN      | GPX7          | TMEM159       | MRPL11        | MAPK3         | SH3KBP1       |
| SVEP1     | CIDEA         | YIF1A         | LOC654426     | 2600010E01RIK | ME2           |
| AGPAT2    | UGT1A10       | MC2R          | MCOLN1        | NUMA1         | BC031181      |
| LUM       | PTRF          | CD248         | CHCHD4        | MRPS16        | MCTS1         |
| MAPK1     | PI16          | SLC19A1       | MRPL3         | LOC100045697  | HLCS          |
| HSPA8     | PLEKHB2       | HTATIP2       | FRMD6         | TSPAN7        | PLD2          |
| ATP5F1    | LOC641240     | CHPT1         | SRPX          | COL14A1       | 4631427C17RIK |
| GPR81     | MKNK1         | ZFP207        | TNFRSF1A      | PGAM1         | MS4A6D        |
| AKR1B7    | APOA2         | ACSM3         | STX18         | 2610204L23RIK | MYCL1         |
| G0S2      | EMP3          | GSTT1         | IER3IP1       | EG630499      | MAEA          |

Table S3. *Cont.*

|          |              |               |               |               |               |
|----------|--------------|---------------|---------------|---------------|---------------|
| PXMP2    | SPR          | PPP2R1A       | GBP2          | VTN           | RPS27A        |
| CRTAP    | TGFBR3       | COX7A2L       | GPX1          | PCX           | 2510010F15RIK |
| H2-AB1   | LPIN1        | EMD           | ATP6V0E2      | TMEM100       | ARHGDIB       |
| HTRA1    | MRPL9        | H2-M3         | MRPL53        | CMTM7         | MAPK1         |
| GPR109A  | SLC1A5       | NAP1L1        | PEG3          | HTRA3         | 9030624J02RIK |
| FSTL1    | ADH1         | EAR4          | MPP1          | TCEAL8        | LOC100048613  |
| RARRES2  | EMILIN2      | LOC100047937  | OSTF1         | TGFBI         | CHST12        |
| COL15A1  | ADFP         | PRKCDBP       | IFI35         | CCDC80        | TM6SF1        |
| RNF4     | GALM         | BLCAP         | CD83          | RPL18         | AU019823      |
| CD14     | MSN          | IFITM2        | GSTO1         | RBPMS2        | H3F3A         |
| RNASET2  | LOC100046650 | LOC381629     | HCLS1         | 1500032L24RIK | ZCCHC14       |
| FFAR2    | PSME2        | GSTP2         | OSTM1         | SNRPB         | CDKN2C        |
| EG433923 | NAPEPLD      | GNB1          | FKBP9         | TRAPPC4       | 9330186A19RIK |
| SPARC    | SNF1LK2      | D430028G21RIK | FOXO1         | JAZF1         | MRPL4         |
| ORM1     | HP           | LOC100048413  | SRD5A3        | PDDC1         | A730042J05RIK |
| C1QC     | GNG10        | 2010004A03RIK | SCP2          | CRYAB         | VKORC1        |
| CXX1C    | GFPT2        | OXCT1         | P2RX4         | ANXA6         | YKT6          |
| H2AFZ    | DHRS1        | TMED10        | G6PDX         | ENTPD2        | AMOTL2        |
| ARL6IP5  | FADS3        | HNRPF         | LOC100047012  | LRG1          | CPNE8         |
| CYP4B1   | LGALS3BP     | PRKCB1        | CSPG4         | UQCRH         | 2700038C09RIK |
| SORBS1   | MXRA8        | ABCD2         | SEPP1         | SCOTIN        | D830050J10RIK |
| TRF      | HSD11B1      | RAP2A         | NID1          | PRTN3         | EMILIN1       |
| NTRK2    | ITGA7        | FOLR2         | COPS6         | HIST1H2BF     | 1110031B06RIK |
| SAA3     | IAH1         | MOBK1B        | GSTP1         | CLPTM1        | NOL5A         |
| ACTN4    | PHKG1        | DOCK1         | DPEP1         | HRAS1         | PER3          |
| SYNGR2   | NPR3         | COQ9          | 1110002N22RIK | CD68          | LDHA          |

Table S3. *Cont.*

|              |               |                    |               |              |               |
|--------------|---------------|--------------------|---------------|--------------|---------------|
| S100A1       | SLC2A4        | TSC22D1            | SDF2          | NDUFB6       | BC038156      |
| SUCNR1       | SUMO3         | CAPNS1             | MPDU1         | CLTA         | APOE          |
| HEBP1        | MYADM         | B4GALT1            | 1190002H23RIK | GMPR         | GRB10         |
| LGMN         | ATP5L         | DAD1               | CHIC2         | PPP1R8       | TINAGL        |
| LY6C1        | TPPP3         | UBE2E3             | PDK4          | RAC2         | BCKDK         |
| CXCL1        | EPS8          | CXX1A              | AHNAK         | PLTP         | 2700078K21RIK |
| TIMP4        | SOD3          | RPS2               | CXCL9         | KCNJ8        | CDK2AP2       |
| LOC100045567 | IDH1          | CAR3               | IARS2         | LOC100047653 | ACSF3         |
| CEBPA        | ITGA1         | BMP3               | WWTR1         | MED11        | PPAPDC1       |
| PLA1A        | CYC1          | GPD1               | RPS7          | EG622320     | SPCS1         |
| CISH         | PHGDH         | NDUFS2             | MTPN          | FCGRT        | A730008L03RIK |
| COL4A2       | EMP1          | THBS2              | PODN          | AP2A2        | SNTG2         |
| SERPING1     | S100A8        | MRAP               | CYBA          | PPAP2C       | MTAP          |
| TSPO         | DARC          | SCARA5             | CHURC1        | TMEM41A      | ORAI3         |
| PHLDA3       | 1190005I06RIK | PCBP1              | RTN2          | KDEL2        | D930001I22RIK |
| RPS6         | PRDX3         | 2310044H10RIK      | PPCS          | LRRC8        | RPS4X         |
| MMP2         | MNAT1         | OTTMUSG00000000971 | OLFM1         | AW146242     | CCM2          |
| PRKCB1       | NDUFC2        | TMEM9B             | MGL2          | DHRS7        | CASP6         |
| CTSF         | 2310008M10RIK | MRV1               | TMEM43        | NFKB1        | MAPK14        |
| SLIT3        | TSPAN3        | NOMO1              | CALU          | HFE          | IL2RG         |
| H2-EB1       | COL6A2        | MRC1               | EPB4.1L1      | EPDR1        | TBC1D9B       |
| ENC1         | PLIN          | TGFBR2             | FGFRL1        | EAR2         | TMEM16K       |
| CD74         | 5730437N04RIK | LOC100047353       | CIITA         | VPS35        | TPST1         |
| EG667977     | ALOX5AP       | RAB18              | PEPD          | ITIH5        | CAML          |
| LEP          | LOC100043257  | SGTA               | BC051227      | IL1B         | CTSH          |
| EHD2         | POLD4         | RBCK1              | L7RN6         | TIMP1        | ROCK1         |

**Table S3.** *Cont.*

|               |               |          |          |        |        |
|---------------|---------------|----------|----------|--------|--------|
| EEF2          | BC004044      | SLC11A2  | MGC41689 | COPZ1  | PPP5C  |
| SORL1         | VNN3          | ERRFI1   | THRA     | PTGES  | SCAMP3 |
| TRP53INP2     | C1QA          | BC013712 | MAN2A1   | MGST1  | HRAS1  |
| 4833421E05RIK | 9030224M15RIK | TNNC2    | ACAA2    | MRPL34 |        |

**Table S4.** Validated genes by qRT-PCR.

| Upregulated Genes |         | Downregulated Genes |
|-------------------|---------|---------------------|
| DEFB37            | CLDN3   | VIM                 |
| DEFB38            | PDZK1   | LUM                 |
| PRM1              | ADAM3   | MAPK1               |
| SPINT4            | SEC11C  | ATP5F1              |
| DEFB39            | DEFB15  | FSTL1               |
| OAZ3              | MRPL52  | RARRES2             |
| SMCP              | POLR2G  | CD14                |
| NPY               | YWHAZ   | PRKCB1              |
| FABP9             | DEFB21  | GPX7                |
| SPINK2            | COX6C   | MKMK1               |
| SPINK8            | TCP11   | HSD11B1             |
| TNP1              | COX8C   | SOD3                |
| CUZD1             | CRISP4  | PRKCB1              |
| SPINK11           | CLDN11  | LOX                 |
| DEFB2             | SLFN1   | TNFRSF1A            |
| TSSK6             | LRRC50  | FOXO1               |
| RPL3L             | GRB7    | CYBA                |
| WFDC15B           | PTGDS   | TGFBI               |
| DEFB11            | ATP13A4 | HRAS1               |
| WFDC10            | DEFB40  | NFKB1               |
| SPINLW1           | SPINK10 | MAPK1               |



**Table S4. Cont.**

| <b>Upregulated Genes</b> |         | <b>Downregulated Genes</b> |
|--------------------------|---------|----------------------------|
| LDHC                     | CDH16   | MAPK14                     |
| PGK2                     | KRT18   | ROCK1                      |
| SPATA19                  | DEFB30  | PPP5C                      |
| GSG1                     | HRASLS5 | HRAS1                      |
| ZNRF4                    | LTF     |                            |
| SERPINA1F                | EIF3K   |                            |
| CLGN                     | CYP1B1  |                            |
| KCNK1                    | PTPN1   |                            |
| TSGA8                    | SPHK1   |                            |
